# Supplementary material
Source: publisher site journal article supplement (https://www.dovepress.com/article/594212)
Supplement: Supplementary file 1 [file 594212%20Revised%20Supplementary%20Material.docx]

**Supplementary Information for**

Yin-Hua Li-Shi Formula Exerts Anti-Atopic Dermatitis Effects Through Luteolin Targeting AKT/MAPK-IL-6/IL-17 Axis

**Table S1 Detailed UPLC-MS/MS parameters.**

| **Part I. Instrumentation and Reagents** | | | |
| --- | --- | --- | --- |
| Item | Specification/Model | Manufacturer/Brand |  |
| UPLC System | ACQUITY UPLC I-Class | Waters |  |
| Mass Spectrometer | Thermo Orbitrap QE HF | Thermo Fisher Scientific |  |
| Chromatographic Column | ACQUITY UPLC HSS T3 column (1.8 µm, 2.1 × 100 mm) | Waters |  |
| Methanol | LC-MS Grade (Cat. No.: A452-4) | Thermo Fisher Scientific |  |
| Acetonitrile | LC-MS Grade (Cat. No.: A998-4) | Thermo Fisher Scientific |  |
| Formic Acid | LC-MS Grade (Cat. No.: A117-50) | Thermo Fisher Scientific |  |
| Water | Ultrapure Water | In-house preparation |  |
| **Part II. Chromatographic Conditions (UPLC)** | | | |
| Parameter | Condition |  |  |
| Mobile Phase A | Water (with 0.1% formic acid, v/v) |  |  |
| Mobile Phase B | Acetonitrile (with 0.1% formic acid, v/v) |  |  |
| Gradient Program | Time (min) | A% | B% |
|  | 0 | 95 | 5 |
|  | 2 | 95 | 5 |
|  | 4 | 70 | 30 |
|  | 8 | 50 | 50 |
|  | 10 | 20 | 80 |
|  | 14 | 0 | 100 |
|  | 15 | 0 | 100 |
|  | 15.1 | 95 | 5 |
|  | 16 | 95 | 5 |
| Flow Rate | 0.35mL/min |  |  |
| Column Temperature | 45℃ |  |  |
| Injection Volume | 2μL |  |  |
| **Part III. Mass Spectrometric Conditions (MS/MS)** | | | |
| Parameter | Positive Ion Mode (ESI+) | Negative Ion Mode (ESI-) |  |
| Spray Voltage | 3800V | -3200V |  |
| Capillary Temperature | 320℃ | 320℃ |  |
| Sheath Gas Flow Rate | 35Arb | 35Arb |  |
| Auxiliary Gas Flow Rate | 8Arb | 8Arb |  |
| Full Scan Range | m/z 100-1500 | m/z 100-1500 |  |
| Full MS Resolution | 60,000 | 60,000 |  |
| MS/MS Resolution (HCD) | 15,000 | 15,000 |  |
| Collision Energy (HCD, NCE) | 10, 20, 40 eV | 10, 20, 40 eV |  |
